# Supplementary material
Source: publisher site journal article supplement (https://www.dovepress.com/article/529674)

**Table 1 Subgroup analysis of sociodemographic factors on mindfulness, SAQ, and benefit-finding (n=319)**

| **Variables** | | **Number （Proportion%）** | **Mindfulness score M（P25，P75）** | **H（K）/Zvalue** | ***P* value** | **SAQ score M（P25，P75）** | **H（K）/Zvalue** | ***P* value** | **Benefit-finding score M（P25，P75）** | **H（K）/Zvalue** | ***P* value** |
| --- | --- | --- | --- | --- | --- | --- | --- | --- | --- | --- | --- |
| **Gender** | **Female** | 279（87.46） | 124.00  （94.00,139.00） | -0.61 | 0.542 | 40.00  （32.00,45.00） | -1.419 | 0.156 | 70.00  （60.00,75.00） | -0.74 | 0.459 |
|  | **Male** | 40（12.54） | 125.00  （85.25,137.00） | 39.00  （31.00,41.00） | 71.00  （59.25,75.00） |
| **Educational Levels** | **Junior high school and below** | 68（21.32） | 101.00  （78.25,137.00） | 10.697 | 0.005 | 35.50  （23.00,40.00） | 7.709 | 0.021 | 66.00  （40.25,72.00） | 13.529 | 0.001 |
|  | **Senior high school/junior college** | 173（54.23） | 125.00  （98.00,137.00） | 39.00  （33.00,41.00） | 70.00  （62.50,75.00） |
|  | **Bachelor degree or above** | 78（24.45） | 132.50  （101.00,140.00） | 40.00  （35.00,42.00） | 70.00  （60.00,75.00） |
| **Age (years)** | **18-29** | 93（29.15） | 132.00  （98.00,140.00） | 10.847 | 0.013 | 40.00  （31.00,42.50） | 9.712 | 0.021 | 73.00  （67.50,76.00） | 28.534 | <0.001 |
|  | **30-39** | 91（28.53） | 125.00  （97.00,137.00） | 39.00  （32.00,42.00） | 69.00  （58.00,74.00） |
|  | **40-49** | 68（21.32） | 114.00  （89.75,134.75） | 35.50  （29.00,40.00） | 70.00  （62.25,73.75） |
|  | **50 and above** | 67（21.00） | 104.00  （89.00,135.00） | 38.00  （23.00,42.00） | 63.00  （42.00,73.00） |
| **Monthly salary (Yuan)** | **Below 3000** | 57（17.87） | 111.00  （87.50,139.50） | 12.169 | 0.007 | 33.00  （24.00,40.00） | 11.454 | 0.01 | 70.00  （44.00,74.00） | 7.628 | 0.054 |
|  | **3000-7000** | 127（39.81） | 104.00  （92.00,137.00） | 39.00  （27.00,42.00） | 69.00  （57.00,74.10） |
|  | **7000-11000** | 107（33.54） | 128.00  （101.00,139.99） | 39.00  （31.00,42.00） | 71.00  （63.00,75.00） |
|  | **More than 11,000** | 28（8.78） | 134.50  （104.75,140.75） | 40.00  （35.00,43.00） | 70.00  （61.75,75.00） |
| **Religious belief** | **No** | 26（8.15） | 119.50  （88.25,136.00） | -0.564 | 0.573 | 40.00  （27.00,43.00） | -0.718 | 0.473 | 71.50  （62.25,74.25） | -0.539 | 0.59 |
|  | **Yes** | 293（91.85） | 125.00  （94.00,138.00） | 38.00  （31.00,41.00） | 70.00  （59.00,74.00） |
| **Marital status** | **Married** | 203（63.64） | 119.00  （94.00,137.00） | 4.259 | 0.119 | 37.00  （35.00,43.00） | 1.454 | 0.483 | 69.00  （57.00,74.00） | 8.768 | 0.012 |
|  | **Unmarried** | 106（33.23） | 130.00  （97.75,140.00） | 39.50  （30.00,42.00） | 71.00  （66.75,75.00） |
|  | **Others** | 10（3.13） | 101.00  （80.75,123.75） | 38.50  （28.00,40.50） | 65.00  （56.75,69.25） |
| **Occupational status** | **Freelance** | 77（24.14） | 125.00  （101.00,137.00） | 4.278 | 0.118 | 38.00  （29.00,40.00） | 3.332 | 0.189 | 70.00  （63.00,74.00） | 5.269 | 0.072 |
|  | **Currently Employed** | 160（50.16） | 128.00  （94.00,139.00） | 39.00  （33.00,44.00） | 70.00  （60.00,75.00） |
|  | **Others** | 82（25.70） | 104.50  （90.25,137.25） | 39.50  （31.75,42.00） | 67.50  （47.00,74.00） |
| **Presence of other diseases besides SLE** | **No** | 201（63.01） | 128.00  （97.00,139.00） | -2.61 | 0.009 | 39.00  （31.00,41.00） | -0.212 | 0.832 | 70.00  （62.50,75.00） | -2.849 | 0.004 |
|  | **Yes** | 118（36.99） | 103.50  （92.75,135.00） | 38.75  （33.00,42.00） | 68.50  （53.50,74.00） |
| **Course of the disease（year）** | **0.5-5** | 117（36.68） | 123.00  （93.50,139.50） | 0.249 | 0.993 | 39.00  （31.50,41.00） | 6.153 | 0.188 | 68.00  （51.50,74.00） | 6.149 | 0.188 |
|  | **6-10** | 98（30.72） | 125.00  （94.00,137.00） | 40.00  （32.00,44.00） | 70.00  （62.75,75.00） |
|  | **11-15** | 53（16.62） | 126.00  （89.00,138.50） | 39.00  （30.00,43.50） | 70.00  （63.00,75.00） |
|  | **16-20** | 27（8.46） | 125.00  （98.00,135.00） | 38.00  （33.00,40.00） | 73.00  （63.00,75.00） |
|  | **More than 20** | 24（7.52） | 119.00  （101.50,137.00） | 38.50  （32.25,43.00） | 71.00  （64.00,75.00） |
| **Medical expense payment method** | **Self-pay** | 36（11.29） | 101.00  （82.00,134.75） | 6.438 | 0.04 | 33.00  （23.00,39.00） | 4.916 | 0.086 | 61.00  （42.00,73.00） | 9.846 | 0.007 |
|  | **Enterprise and Institution Medical Insurance** | 218（68.34） | 127.00  （94.00,139.00） | 39.00  （32.50,42.00） | 70.00  （63.00,75.00） |
|  | **New Rural Cooperative Medical Scheme** | 65（20.38） | 116.00  （95.50,136.00） | 38.72  （30.00,41.50） | 70.00  （54.50,74.00） |

**Table 2 Correlation analysis of mindfulness, SAQ, and benefit-finding in SLE patients**

|  | 1 | 2 | 3 | 4 | 5 | 6 | 7 | 8 | 9 | 10 | 11 | 12 | 13 | 14 | 15 | 16 |
| --- | --- | --- | --- | --- | --- | --- | --- | --- | --- | --- | --- | --- | --- | --- | --- | --- |
| 1 | 1.000 |  |  |  |  |  |  |  |  |  |  |  |  |  |  |  |
| 2 | .832** | 1.000 |  |  |  |  |  |  |  |  |  |  |  |  |  |  |
| 3 | .805** | .648** | 1.000 |  |  |  |  |  |  |  |  |  |  |  |  |  |
| 4 | .806** | .612** | .603** | 1.000 |  |  |  |  |  |  |  |  |  |  |  |  |
| 5 | .860** | .684** | .613** | .645** | 1.000 |  |  |  |  |  |  |  |  |  |  |  |
| 6 | .877** | .676** | .691** | .679** | .735** | 1.000 |  |  |  |  |  |  |  |  |  |  |
| 7 | .120* | .111* | .138* | 0.091 | 0.076 | .119* | 1.000 |  |  |  |  |  |  |  |  |  |
| 8 | .124* | 0.073 | .149** | 0.095 | 0.067 | .137* | .790** | 1.000 |  |  |  |  |  |  |  |  |
| 9 | .130* | .136* | .127* | 0.108 | 0.097 | .142* | .838** | .396** | 1.000 |  |  |  |  |  |  |  |
| 10 | .383** | .322** | .230** | .329** | .405** | .320** | .301** | .260** | .263** | 1.000 |  |  |  |  |  |  |
| 11 | .342** | .318** | .166** | .314** | .333** | .319** | 0.105 | 0.075 | .136* | .766** | 1.000 |  |  |  |  |  |
| 12 | .253** | .139* | .275** | .190** | .209** | .211** | .297** | .262** | .262** | .643** | .473** | 1.000 |  |  |  |  |
| 13 | .222** | .126* | .126* | .255** | .200** | .162** | .294** | .304** | .208** | .683** | .499** | .457** | 1.000 |  |  |  |
| 14 | .327** | .286** | .192** | .258** | .403** | .283** | .224** | .189** | .213** | .810** | .544** | .448** | .404** | 1.000 |  |  |
| 15 | .226** | .254** | .151** | .170** | .219** | .179** | .279** | .227** | .254** | .665** | .516** | .472** | .408** | .419** | 1.000 |  |
| 16 | .362** | .376** | .230** | .316** | .337** | .337** | .285** | .269** | .259** | .721** | .606** | .485** | .456** | .489** | .480** | 1.000 |

Note: 1 to 16 are mindfulness, observing, describing, acting with awareness, non-judgment, non-reactivity, self-acceptance (SAQ), self-acceptance (SAQ-SA), self-evaluation (SAQ-SE), the benefit-finding, acceptance, family relations, worldview, personal growth, social relations, health behaviors, respectively.

Significance levels: P < 0.05 (*), P < 0.01 (**).

**Table 3 Factor loading coefficient table.**

| **Variable** | **Std** | **SE** | **Z(CR)** | **P** | **CR** | **AVE** |
| --- | --- | --- | --- | --- | --- | --- |
| **Mindfulness** |  |  |  |  |  |  |
| Observing | 0.525 | 0.07 | 7.462 | *** | 0.967 | 0.594 |
| Describing | 0.591 | 0.075 | 7.915 | *** |
| Acting with awareness | 0.517 | 0.071 | 7.335 | *** |
| Non-judgment | 0.684 | 0.083 | 8.233 | *** |
| Non-reactivity | 0.644 | 0.079 | 8.172 | *** |
| **Self-Acceptance Questionnaire (SAQ)** |  |  |  |  |  |  |
| SAQ-SA | 0.382 | 0.043 | 8.974 | *** | 0.947 | 0.53 |
| SAQ-SE | 0.407 | 0.047 | 8.746 | *** |
| **Benefit-finding** |  |  |  |  |  |  |
| Acceptance | 0.595 | 0.076 | 7.832 | *** | 0.96 | 0.546 |
| Family relations | 0.44 | 0.073 | 5.998 | *** |
| Worldview | 0.556 | 0.078 | 7.083 | *** |
| Personal growth | 0.469 | 0.064 | 7.342 | *** |
| Social relations | 0.397 | 0.064 | 6.158 | *** |
| Health behaviors | 0.483 | 0.071 | 6.8 | *** |

Note: All standardized factor loadings were statistically significant for their corresponding latent variables (***P < 0.001).

**Table 4 Structural Equation Model fitting index (n = 319)**

| **Project** | **χ2** | **CMIN/df** | **GFI** | **NFI** | **CFI** | **IFI** | **TLI** | **RMSEA** |
| --- | --- | --- | --- | --- | --- | --- | --- | --- |
| **Modified fitting index** | 153.202 | 2.512 | 0.933 | 0.927 | 0.955 | 0.955 | 0.942 | 0.069 |
| **Acceptable standards** | / | < 5 | > 0.9 | > 0.9 | > 0.9 | > 0.9 | > 0.9 | < 0.08 |

Note: CMIN/df Maximum likelihood ratio χ2 values / degrees of freedom, RFI Relative fitness index, NFI Standard fit index, CFI Comparative fit index, IFI Value added index, TLI Nonstandard fit index, RMSEA Mean square sum square root of progressive residuals.

**Table 5 Coefficient decomposition of mindfulness, SAQ-SA, SAQ-SE, and benefit-finding effect model in SLE patients (n=319)**

|  |  | **Estimated value** | **SE** | **95% confidence interval** | |  |
| --- | --- | --- | --- | --- | --- | --- |
|
|  |  |  |  | **Lower bound** | **upper bound** | **p-value** |
| **Direct effect** |  |  |  |  |  |  |
| Mindfulness | self-evaluation | 0.238 | 0.06 | 0.113 | 0.349 | 0 |
|  | self-acceptance | 0.17 | 0.065 | 0.035 | 0.29 | 0.015 |
|  | benefit-finding | 0.414 | 0.053 | 0.302 | 0.511 | 0 |
| SAQ-SE | benefit-finding | 0.162 | 0.061 | 0.045 | 0.284 | 0.009 |
| SAQ-SA | benefit-finding | 0.233 | 0.059 | 0.119 | 0.348 | 0.001 |
| **Indirect effect** | |  |  |  |  |  |
| mindfulness | benefit-finding | 0.078 | 0.027 | 0.03 | 0.137 | 0.001 |
| **Total effect** |  |  |  |  |  |  |
| mindfulness | benefit-finding | 0.492 | 0.057 | 0.369 | 0.593 | 0.001 |

**Table 6 Path coefficient estimates, standard errors, 95% confidence intervals, and effect proportions for each path**

| **Effect** | **Path** | **Estimated value** | **Standard error** | **Effect size** | **Total effect** | **Bootstrap** |
| --- | --- | --- | --- | --- | --- | --- |
| **（95%CI）** |
| Direct effect | M-BF | 0.414 | 0.053 | 84.15% | 0.492 | [0.302～0.511] |
| Indirect effect | M-SAQ-SA- BF | 0.0391 | 0.027 | 7.95% | [0.045～0.284] |
|  | M--SAQ-SE- BF | 0.0384 | 0.027 | 7.74% | [0.119～0.348] |

Note: M, BF, SAQ-SA, SAQ-SE were mindfulness, benefit-finding, self-acceptance, self-evaluation, respectively.

**Figure 1. Hypothetical model**


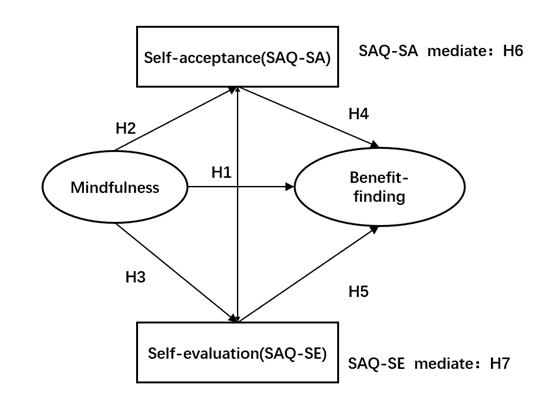


**Figure 2. Model of the mediating effect of SAQ-SA, SAQ-SE on mindfulness, and the benefit-finding of SLE patients**


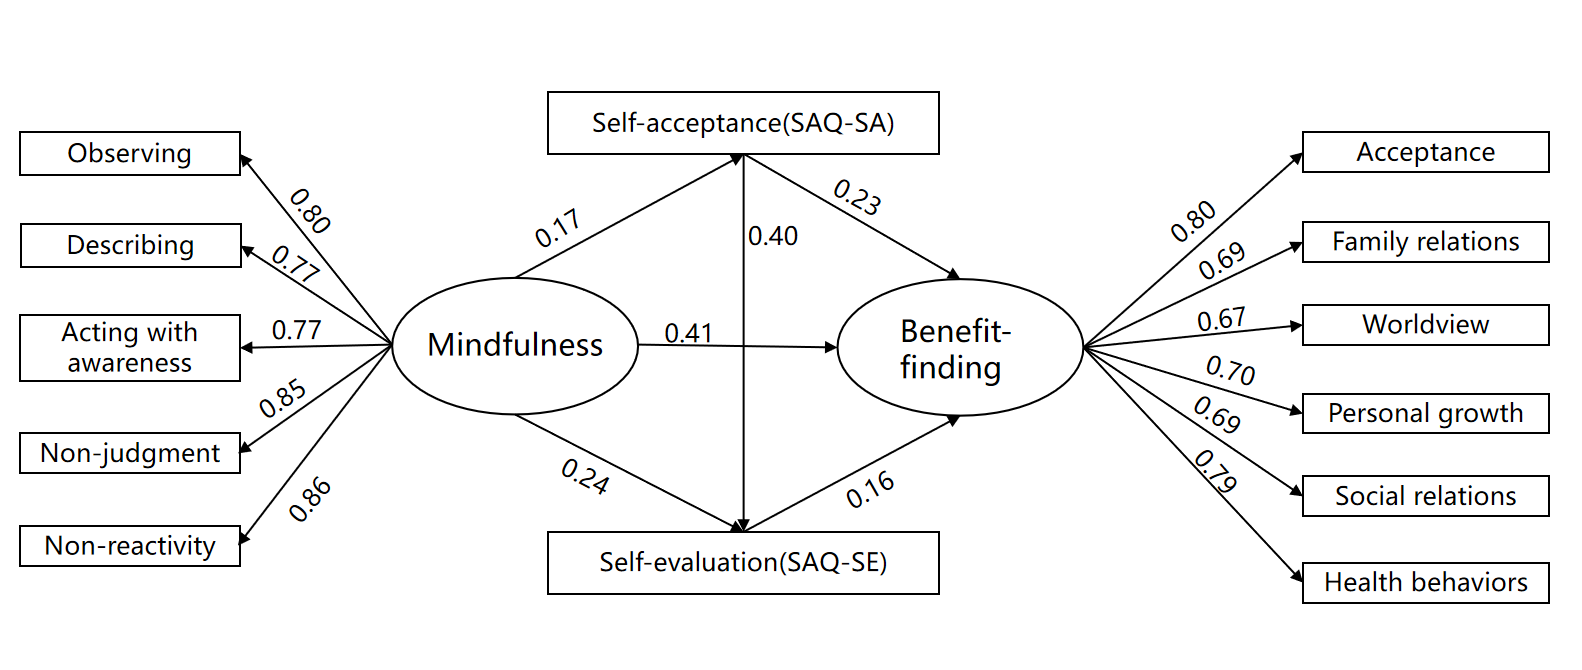

Supplement: Supplementary file 1 [file Supplementary%20materials.docx]
